# Supplementary material
Source: Springer Nature journal article supplement (https://www.springermedizin.de/resource/supplementary/12936_2006_350_MOESM1_ESM.pdf/9547616)

**(A)**

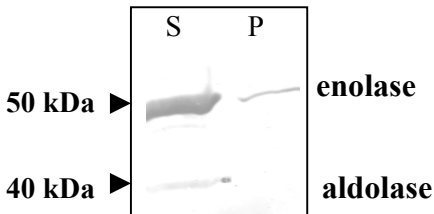

**(B)**

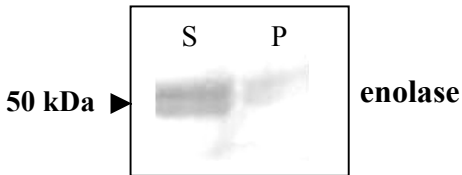

**(C)**

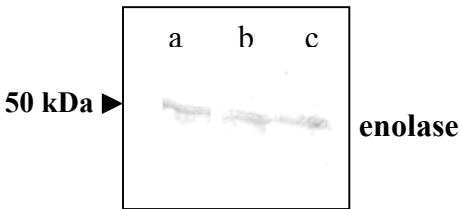

Supplement: MOESM1 [file 9547616]
